# Supplementary material for: Generation of a Biomimetic Substitute of the Corneal Limbus Using Decellularized Scaffolds
Source: MDPI journal article supplement (doi:10.3390/pharmaceutics13101718), 2021-10-17
Supplement: s1 [file s1]

# Supplementary Materials: Generation of a Biomimetic Substitute of the Corneal Limbus Using Decellularized Scaffolds

David Sánchez-Porras, Manuel Caro-Magdaleno, Carmen González-Gallardo, Óscar Darío García-García, Ingrid Garzón, Víctor Carriel, Fernando Campos and Miguel Alaminos

**Table S1.** Preliminary analysis of light transmittance at three different wavelengths (400, 550 and 700 nm) as determined by spectrophotometric analysis of human native limbus (HCTR) and RL decellularized with SIRC and hADSC cells at days 7, 14 and 21 of follow-up. Values correspond to percentages of transmittance using the values obtained in HCTR as reference (100% transmittance).

|               | 400 nm      | 550 nm     | 700 nm     | Average      |
|---------------|-------------|------------|------------|--------------|
| HCTR          | 100±0.03    | 100±2.22   | 100±3.04   | 100±0        |
| RL-SIRC-D7    | 70.76±0.07  | 50.66±0.47 | 64.53±0.76 | 61.98±10.29  |
| RL-SIRC-D14   | 50.5±0.08   | 50.31±1.09 | 72.84±2.16 | 57.88±12.96  |
| RL-SIRC-D21   | 138.51±0.18 | 77.22±0.64 | 91.58±0.34 | 102.44±32.06 |
| RL-hADSC-D7   | 121.13±0.07 | 66.94±0.76 | 82.88±1.63 | 90.32±27.85  |
| RL-hADSC -D14 | 15.73±0     | 31.68±0.03 | 61.9±0.15  | 36.44±23.45  |
| RL-hADSC -D21 | 24.51±0.02  | 28.12±0.05 | 41.83±0.31 | 31.49±9.14   |
